# Supplementary material for: Light at night and modeled circadian disruption predict higher risk of mortality: A prospective study in >88,000 participants
Source: bioRxiv or medRxiv preprint supplement (doi:10.1101/2023.09.08.23295231), 2023-09-08
Supplement: Supplementary file [file media-2.pdf]

## STROBE Checklist

STROBE Statement—Checklist of items that should be included in reports of *cohort studies*

|                      | Item No | Recommendation                                                                                                                           | Manuscript Section                                                                                                                                            |
|----------------------|---------|------------------------------------------------------------------------------------------------------------------------------------------|---------------------------------------------------------------------------------------------------------------------------------------------------------------|
| Title and abstract   | 1       | (a) Indicate the study's design with a commonly used term in the title or the abstract                                                   | <ul style="list-style-type: none"> <li>Title</li> </ul>                                                                                                       |
|                      |         | (b) Provide in the abstract an informative and balanced summary of what was done and what was found                                      | <ul style="list-style-type: none"> <li>Abstract</li> </ul>                                                                                                    |
| <b>Introduction</b>  |         |                                                                                                                                          |                                                                                                                                                               |
| Background/rationale | 2       | Explain the scientific background and rationale for the investigation being reported                                                     | <ul style="list-style-type: none"> <li>Introduction, Paragraphs 1-2</li> </ul>                                                                                |
| Objectives           | 3       | State specific objectives, including any prespecified hypotheses                                                                         | <ul style="list-style-type: none"> <li>Introduction, Paragraph 3</li> </ul>                                                                                   |
| <b>Methods</b>       |         |                                                                                                                                          |                                                                                                                                                               |
| Study design         | 4       | Present key elements of study design early in the paper                                                                                  | <ul style="list-style-type: none"> <li>Introduction, Paragraph 3</li> <li>Methods: Overview</li> </ul>                                                        |
| Setting              | 5       | Describe the setting, locations, and relevant dates, including periods of recruitment, exposure, follow-up, and data collection          | <ul style="list-style-type: none"> <li>Abstract</li> <li>Methods: Overview</li> <li>Results: Descriptive statistics</li> <li>Supplementary methods</li> </ul> |
| Participants         | 6       | (a) Give the eligibility criteria, and the sources and methods of selection of participants. Describe methods of follow-up               | <ul style="list-style-type: none"> <li>Methods: Overview</li> <li>Supplementary methods</li> </ul>                                                            |
|                      |         | (b) For matched studies, give matching criteria and number of exposed and unexposed                                                      | <ul style="list-style-type: none"> <li>N/A</li> </ul>                                                                                                         |
| Variables            | 7       | Clearly define all outcomes, exposures, predictors, potential confounders, and effect modifiers. Give diagnostic criteria, if applicable | <ul style="list-style-type: none"> <li>Methods: Overview</li> <li>Methods: Light exposure profiles</li> <li>Methods: Covariates</li> </ul>                    |

|                              |     |                                                                                                                                                                                                   |                                                                                                                                                      |
|------------------------------|-----|---------------------------------------------------------------------------------------------------------------------------------------------------------------------------------------------------|------------------------------------------------------------------------------------------------------------------------------------------------------|
|                              |     |                                                                                                                                                                                                   | <ul style="list-style-type: none"> <li>• Supplementary methods</li> </ul>                                                                            |
| Data sources/<br>measurement | 8*  | For each variable of interest, give sources of data and details of methods of assessment (measurement). Describe comparability of assessment methods if there is more than one group              | <ul style="list-style-type: none"> <li>• Methods: Overview</li> <li>• Methods: Covariates</li> <li>• Supplementary methods</li> </ul>                |
| Bias                         | 9   | Describe any efforts to address potential sources of bias                                                                                                                                         | <ul style="list-style-type: none"> <li>• Methods: Statistical analysis</li> <li>• Supplementary methods</li> </ul>                                   |
| Study size                   | 10  | Explain how the study size was arrived at                                                                                                                                                         | <ul style="list-style-type: none"> <li>• N/A</li> </ul>                                                                                              |
| Quantitative<br>variables    | 11  | Explain how quantitative variables were handled in the analyses. If applicable, describe which groupings were chosen and why                                                                      | <ul style="list-style-type: none"> <li>• Methods: Statistical analysis</li> <li>• Supplementary methods</li> </ul>                                   |
| Statistical methods          | 12  | (a) Describe all statistical methods, including those used to control for confounding                                                                                                             | <ul style="list-style-type: none"> <li>• Methods: Statistical analysis</li> <li>• Supplementary methods</li> <li>• Supplementary analyses</li> </ul> |
|                              |     | (b) Describe any methods used to examine subgroups and interactions                                                                                                                               | <ul style="list-style-type: none"> <li>• Methods: Statistical analysis</li> <li>• Supplementary S7-9</li> </ul>                                      |
|                              |     | (c) Explain how missing data were addressed                                                                                                                                                       | <ul style="list-style-type: none"> <li>• Methods: Light exposure profiles</li> <li>• Supplementary methods</li> </ul>                                |
|                              |     | (d) If applicable, explain how loss to follow-up was addressed                                                                                                                                    | <ul style="list-style-type: none"> <li>• N/A</li> </ul>                                                                                              |
|                              |     | (e) Describe any sensitivity analyses                                                                                                                                                             | <ul style="list-style-type: none"> <li>• Methods: Statistical analysis</li> <li>• Supplementary S7-9</li> </ul>                                      |
| <b>Results</b>               |     |                                                                                                                                                                                                   |                                                                                                                                                      |
| Participants                 | 13* | (a) Report numbers of individuals at each stage of study—eg numbers potentially eligible, examined for eligibility, confirmed eligible, included in the study, completing follow-up, and analysed | <ul style="list-style-type: none"> <li>• Methods: Overview</li> <li>• Supplementary methods</li> </ul>                                               |
|                              |     | (b) Give reasons for non-participation at each stage                                                                                                                                              | <ul style="list-style-type: none"> <li>• Methods: Overview</li> </ul>                                                                                |

|                   |     |                                                                                                                                                                                                              |                                                                                                                                                   |
|-------------------|-----|--------------------------------------------------------------------------------------------------------------------------------------------------------------------------------------------------------------|---------------------------------------------------------------------------------------------------------------------------------------------------|
|                   |     | (c) Consider use of a flow diagram                                                                                                                                                                           | <ul style="list-style-type: none"> <li>• N/A</li> </ul>                                                                                           |
| Descriptive data  | 14* | (a) Give characteristics of study participants (eg demographic, clinical, social) and information on exposures and potential confounders                                                                     | <ul style="list-style-type: none"> <li>• Results: Descriptive statistics</li> <li>• Results: Table 1</li> </ul>                                   |
|                   |     | (b) Indicate number of participants with missing data for each variable of interest                                                                                                                          | <ul style="list-style-type: none"> <li>• Supplementary methods</li> <li>• Results: Table 2</li> </ul>                                             |
|                   |     | (c) Summarise follow-up time (eg, average and total amount)                                                                                                                                                  | <ul style="list-style-type: none"> <li>• Abstract</li> <li>• Results: Descriptive statistics</li> </ul>                                           |
| Outcome data      | 15* | Report numbers of outcome events or summary measures over time                                                                                                                                               | <ul style="list-style-type: none"> <li>• Results: Figure 1</li> </ul>                                                                             |
| Main results      | 16  | (a) Give unadjusted estimates and, if applicable, confounder-adjusted estimates and their precision (eg, 95% confidence interval). Make clear which confounders were adjusted for and why they were included | <ul style="list-style-type: none"> <li>• Results: Tables 2-3</li> <li>• Supplementary S7-9</li> <li>• Methods: Statistical analysis</li> </ul>    |
|                   |     | (b) Report category boundaries when continuous variables were categorized                                                                                                                                    | <ul style="list-style-type: none"> <li>• Methods: Statistical analysis</li> </ul>                                                                 |
|                   |     | (c) If relevant, consider translating estimates of relative risk into absolute risk for a meaningful time period                                                                                             | <ul style="list-style-type: none"> <li>• N/A</li> </ul>                                                                                           |
| Other analyses    | 17  | Report other analyses done—eg analyses of subgroups and interactions, and sensitivity analyses                                                                                                               | <ul style="list-style-type: none"> <li>• Supplementary S7-9</li> <li>• Supplementary analyses</li> <li>• Methods: Statistical analysis</li> </ul> |
| <b>Discussion</b> |     |                                                                                                                                                                                                              |                                                                                                                                                   |
| Key results       | 18  | Summarise key results with reference to study objectives                                                                                                                                                     | <ul style="list-style-type: none"> <li>• Discussion: Paragraphs 1</li> </ul>                                                                      |
| Limitations       | 19  | Discuss limitations of the study, taking into account sources of potential bias or imprecision. Discuss both direction and magnitude of any potential bias                                                   | <ul style="list-style-type: none"> <li>• Discussion: Paragraph 6</li> </ul>                                                                       |

|                          |    |                                                                                                                                                                            |                                                                                   |
|--------------------------|----|----------------------------------------------------------------------------------------------------------------------------------------------------------------------------|-----------------------------------------------------------------------------------|
| Interpretation           | 20 | Give a cautious overall interpretation of results considering objectives, limitations, multiplicity of analyses, results from similar studies, and other relevant evidence | <ul style="list-style-type: none"> <li>• Discussion: Paragraphs 2-5, 7</li> </ul> |
| Generalisability         | 21 | Discuss the generalisability (external validity) of the study results                                                                                                      | <ul style="list-style-type: none"> <li>• Discussion: Paragraph 6</li> </ul>       |
| <b>Other information</b> |    |                                                                                                                                                                            |                                                                                   |
| Funding                  | 22 | Give the source of funding and the role of the funders for the present study and, if applicable, for the original study on which the present article is based              | <ul style="list-style-type: none"> <li>• N/A</li> </ul>                           |
